# Supplementary material
Source: PubMed Central journal article supplement (PMC3430341)

## **SUPPLEMENTAL MATERIAL**

**Transcriptional regulation of the *ecp* operon by EcpR, IHF and H-NS in  
attaching and effacing *Escherichia coli***

**Verónica I. Martínez-Santos<sup>1</sup>, Abraham Medrano-López<sup>1</sup>, Zeus Saldaña<sup>2</sup>,  
Jorge A. Girón<sup>2</sup> and José L. Puente<sup>1\*</sup>.**

**Table S1. Oligonucleotide primers used in this study.**

| Primer    | Sequence 5'-3'                                                      | Use                        |
|-----------|---------------------------------------------------------------------|----------------------------|
| hns-H1P1  | CACCCCAATATAAGTTTGGAGTACTACAATG<br>AGCGAAGCTGTAGGCTGGAGCTGCTTCG     | Mutagenesis of <i>hns</i>  |
| hns-H2P2  | GATTTTAAGCAAGTGCAATCTACAAAAGATTA<br>TTGCTTCATATGAATATCCTCCTTAG      | Mutagenesis of <i>hns</i>  |
| hns-M     | TGCTGCGAGCTCATCGGTGTAA                                              | Screening of mutants       |
| hns-O     | GCCTATCATATGAAAGGGAAG                                               | Screening of mutants       |
| himA-H1P1 | ATGGCGCTTACAAAAGCTGAAATGTCAGAATA<br>TCTGTTTGTATTGTAGGCTGGAGCTGCTTCG | Mutagenesis of <i>himA</i> |
| himA-H2P2 | CTTTTTAGTTAGATCAGTACTCCGTTTTGG<br>GCGA AGCGTTCATATGAATATCCTCCTTAG   | Mutagenesis of <i>himA</i> |
| himA-F    | AAGGGTGTTGCGGAGGGGTAT                                               | Screening of mutants       |
| himA-R    | CAAACTGACAGGCATAATAA                                                | Screening of mutants       |
| G64       | GCCTGGAGTTTACTGAACCAACTTATATAATT<br>TTGAGTACAGCATATGAATATCCTCCTTAG  | Mutagenesis of <i>ecpR</i> |
| G65       | AAAGTAGTGACATGGCAAATGATTACAGCAG<br>GGACTATGAGTGTAGGCTGGAGCTGCTTCG   | Mutagenesis of <i>ecpR</i> |
| G92       | ACCTATATTGATATGTGCTACG                                              | Screening of mutants       |
| G93       | CGTTACCAGAGCTATTGCCAG                                               | Screening of mutants       |
| ecpR-600F | CAAAGAGGGGATCCTTCCTGTGAC                                            | pecpR-2                    |
| ecpR-500F | GTTTAATTTTGGATCCCTTATTGG                                            | pecpR-3                    |
| ecpR-400F | CTTTAATGAGGATCCATGATAGTT                                            | pecpR-4                    |
| ecpR-350F | GTTTTTTTACGGATCCATTACACA                                            | pecpR-5                    |
| ecpR-300F | TCAGGGCAAGGATCCTGGCTAATA                                            | pecpR-8                    |
| ecpR-200F | CTTTTTCTTCGGATCCAAAAGCA                                             | pecpR-9                    |
| ecpR-190F | ATATGGATCCAACCATGGAATTCATTTTC                                       | pecpR-10                   |
| ecpR-160F | CTGTGGATCCATTGACACTCATCAGGAA                                        | pecpR-11                   |
| ecpR-130F | ACATGGATCCAAACCTAATCGAAATAAT                                        | pecpR12                    |
| ecpR-100F | TAAACTGGATCCCGTTTAAACCTA                                            | pecpR-13                   |
| ecpR-50F  | ATTTACTTCGGATCCACTAAAGAA                                            | pecpR-14                   |
| ecpR-1R   | TGGGGAGACAAGCTTTATTTATCA                                            | <i>ecpR</i> fusions        |
| ecpA-270F | TGGCCTATGGGATCCATGGCAGGT                                            | ecpA-270                   |

|             |                                                    |                             |
|-------------|----------------------------------------------------|-----------------------------|
| ecpA-180F   | CTCAGGGAAGGATCCCTAAATCGA                           | ecpA-180                    |
| ecpA-80F    | ATATAAGTTGGATCCGTAAACTCC                           | ecpA-80                     |
| ecpA-Rev    | CCGTTACCAAAGCTTTTGCCAGAA                           | <i>ecpA</i> fusions         |
| ecpR-Rev    | TCATAGTCCCTGCTGTAATCA                              | Primer extension            |
| D60A-F      | AAATCAGAAAAGCTTTCGTGTTTAT                          | pT3-D60A                    |
| D60A-R      | ATAAACACGAAAGCTTTTCTGATTT                          | pT3-D60A                    |
| G159A-F     | TGACGGCTCAGGCAATGCTGCCTAA                          | pT3-G159A                   |
| G159A-R     | TTAGGCAGCATTGCCTGAGCCGTC                           | pT3-G159A                   |
| T175A-F     | TGTAGTGTGAAGGCAGTGTATACCC                          | pT3-T175A                   |
| T175A-R     | GGGTATACTGCCTTCACACTACA                            | pT3-T175A                   |
| V176A-F     | GTGTGAAGACAGCGTATACCCATCG                          | pT3-V176A                   |
| V176A-R     | CGATGGGTATACGCTGTCTTCACAC                          | pT3-V176A                   |
| K186A-F     | AATGCAGAGGCCGCGCTGTACTION                          | pT3-K186A                   |
| K186A-R     | TTTGAGTACAGCGCGGCCTCTGCATT                         | pT3-K186A                   |
| G10         | GAAGATCTATGGAATGTCAAACCGTTCT                       | RT-PCR                      |
| G85         | CGCGAATTCTAACTGGTCCAGGTCGCGTCG                     | RT-PCR                      |
| G84         | CGCGGATCCATGAAAAAAGGTTCTGGC                        | RT-PCR                      |
| G12         | CGAAGCTTCTATTTACGGGAATGAACTT                       | RT-PCR                      |
| EcpR-EcoR1F | CAGGTTTGGGAATTCGTGACATGG                           | Cloning of MBP-EcpR         |
| 6HEcpR-R    | AACATAACAAGCTTGGAGTTTACTG                          | Cloning of MBP-EcpR         |
| ecpR-Nco-1F | GGTTTGGACCATGGTGACATGGCAAATG                       | Cloning of EcpR-MycHis      |
| ecpR-H3-R   | CTTGCCTGGAAGCTTCTGAACCAAC                          | Cloning of EcpR-MycHis      |
| pKK-8-BHI-F | GGAATTCTCGGGGAT                                    | <i>In vivo</i> footprinting |
| ecpR-3R     | AATGAATTCCATGGTTAAGTC                              | <i>In vivo</i> footprinting |
| EBS-F       | ACTATTCCTAACACCTCCTTTACCCTGGACTG<br>GCTAATATAAAATG | pecpR-4m3                   |
| EBS-R       | CATTTTATATATGCCAGTCCAGGGTAAAGGAG<br>GTGTTAGGAATAGT | pecpR-4m3                   |
| upEBS-F     | ACACATTAAGACTCGGAATAACACCTCAGGG                    | pecpR-4m1                   |
| upEBS-R     | CCCTGAGGTGTTATTCCGAGTCTTAATGTGT                    | pecpR-4m1                   |
| ecpRm4-F    | CACCTCAGGGCAAAGGGAATGGCTAATATAA<br>AATGC           | pecpR-4m4                   |
| ecpR-m4R    | GCATTTTATATTAGCCATTCCCTTTGCCCTGA<br>GGTG           | pecpR-4m4                   |
| EBSm2-R     | TTTATATTAGCCAGGAACGGGTCCCTGAGGT<br>GTTAGGAAT       | pecpR-4m2                   |
| pKKAp59F    | CTGTTGTTTGTCCGGTGAACG                              | pecpR-4m2                   |
| EBSm2-F     | ATTCCTAACACCTCAGGGACCCGTTCCCTGGC<br>TAATATAAA      | pecpR-4m2                   |
| pKK-8-H3R   | GTTTTGTCCTACTCAAGC                                 | pecpR-4m2                   |
| IHFBS-F     | TCTTCTTATCAAAAAAGGGATCCTTTCATT<br>TTTTGTAAAT       | pecpR-4IRm1                 |
| IHFBS-R     | ATTTACAAAAAATGAAAGGATCCCTTTTTTGT<br>AAGAAGA        | pecpR-4IRm1                 |

|                |                                                     |             |
|----------------|-----------------------------------------------------|-------------|
| IHFm-F         | CTTTTTCTTCTTATCAAAGGGGCGCACCGGC<br>ATTTTTGTAAATATTG | pecpR-4IRm2 |
| IHFm-R         | CAATATTTACAAAAAATGGTGCGCCCTTTTG<br>ATAAGAAGAAAAAG   | pecpR-4IRm2 |
| ecpR-<br>350AC | TTTTACGGATCCATTACACAACACAGGCCTCA<br>GATTCCTAACACC   | pecpR-5m    |

**Fig. S1.** EcpR (also called MatA) belongs to the family of proteins containing a LuxR\_C-like DNA-binding HTH domain. **A)** The amino acid sequence multialignment of EcpR from EHEC EDL933 (AAG 54619.1), NarL from *Pseudomonas aeruginosa* PAO1 (NP\_252568.1), FixJ from *Sinorhizobium meliloti* (CAA79898.1), UhpA from EHEC EDL933 (NP\_290304.1), GerE from *Bacillus subtilis* (CAA11701.1), MalT from *E. coli* K-12 (AAA83888.1), LuxR from *Vibrio fischeri* ES114 (YP\_206883.1), and RmbA from *S. enterica* subsp. *enterica* serovar Typhimurium (AAD16953.1), was done using the ClustalW sequence alignment program from the European Bioinformatics Institute (EMBL-EBI). Identical amino acids are boxed, and similar amino acids are shaded in gray.

**Fig. S2.** Global regulators involved in *ecp* regulation. **A)** Expression of the *ecpR-1 cat* transcriptional fusion in wild type EPEC E2348/69 and its  $\Delta hns$ ,  $\Delta fis$ ,  $\Delta hha$ ,  $\Delta himA$  and  $\Delta stpA$  isogenic mutants. CAT specific activity was determined from samples obtained from static DMEM cultures grown at 30°C. The bars represent the activity of three independent assays with duplicates. Asterisks (\*) correspond to *P* values < 0.0001 between the wild type strain and the mutants. **B)** Western blot with the anti-ECP antibody of whole cell extracts of EPEC E2348/69 and its isogenic  $\Delta hns$  and  $\Delta himA$  mutants transformed with vector pBAD/MycHis A or plasmid pGTG expressing EcpR (Table 1). DnaK was detected as a loading control using a monoclonal anti-DnaK antibody.

Fig. S1

```

NarL  LRLAAELDPDMILLDLAMKGMNG-----LDTLRALREAGVDARIVFTSDDKGDVFN 102
FlxJ  LAFAPDVRNGVLVTLRNPDMSG-----VELLRNLGLKINIPSIITGHGDVPMAVE 92
UtpA  LAGLPGRGVQVCKDIIMPDISG-----LILLSQLPKG---MATIILSHDSPAIVEQ 89
GexE  ----- 1
MalT  LRLMSDLNRNLLLNLQLYWQAGRKSDAQRVLDALNLAARTGFISHPMIEGEAMAQQIRQ 780
LusR  YYDDAGLLEYDFWVDYKSHHS PINWVFEKTKKESRNVIKEAQESGLITGFSFPIHT 128
EcpR  IDRLIYLSLEKIRKDFVINLNT-----SLTEFIRDNENLSAMKGGQVVLIAARK 97
RsbA  LDRHNHLSGFIYVDFSPNLR-----FTLQMADSLADSGSHIVLISDRS 102

NarL  VLRAGADGVLLKDMEPERLEHIRQAATGQMTSPQLTQILAQALRGDDRSKSLDELTER 162
FlxJ  AMKAGAVDFIEKPFEDTVII EAIERASEHLVAAEADVDANDIRAR-----LQTLSEK 145
UtpA  ALNAGARGFLSKRCSFDELIAAVHTVATGCCYITPDIAIKLASGRQ-----DPLTER 141
GexE  -NKE--KEFSK--P-----LTER 15
MalT  LIQLNTLPLELQHRQRLEINQHRRHKFAHF DENFVERLLNHPEVPELIR-TSPLEK 839
LusR  ASNGFGMLSFAHSDKDIYTDSLFLHASTNVPLLPSLVINYQKINTTRKSD--SILTER 186
EcpR  SEALANYWYNSNIRGVVYAGLSRDIRKELAYINGRFLRKDIKKD-----KITDR 148
RsbA  LTPLANYWIKSNKIQGIYSDDDDIVQQQKMHRLFTGRLANSKRG-----RTLNVT 154

NarL  ERQILRQIANGYSKMIARKLITTEGTVKVVHKKRVLHKLGRSRVEAVMAVENDLV--- 219
FlxJ  ERQVLSAVVAGLEPKSIAYDLIISPTVEVHBRANVMAKAKSLPHLVRMAGGFGPS- 204
UtpA  ERQVREKLAQCNAKELAAELGISPKTVHVBANLMEKLGYSNDVELARRMFCM----- 196
GexE  ERVVFELIVQDKTKELASELHISEKTVRNHISNAOKLGVKCRSQAVVELRMGEL-EL 74
MalT  EKQVGLLYSGYSNECIAGELEVAATIKTHIRNYQKLGFAHRQDAVQHAQQLLKMGY 899
LusR  EKECLAWASEGKSTMDISKILGCEHTVTFHLENTQMKINTTRCQSSKALTGAINCP 246
EcpR  EMEIIRMTAQQMLPKSLARIENGCVKIVYTHARNAEAKLYSKLYKLVQ----- 196
RsbA  EFILKRFVSGIETQIVNIDIDIKLYVHLLRENKLGHSIHKIISNIL----- 205

```

Fig. S2

**A**

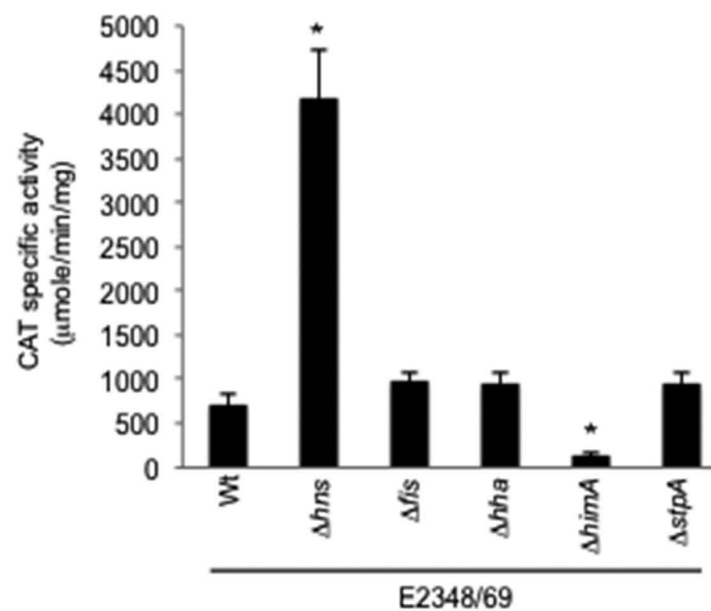

**B**

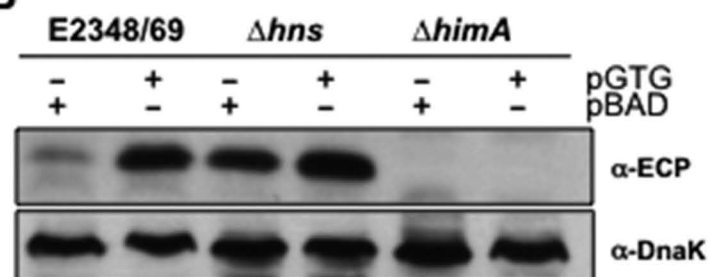

Supplement: JB.00915-12_zjb999091911so1.pdf [file JB.00915-12_zjb999091911so1.pdf]
